# Supplementary material for: Countrywide Spread and Spatiotemporal Diffusion Dynamics of Oropouche virus in Cuba, 2024
Source: Research Square preprint supplement (doi:10.21203/rs.3.rs-7303560/v1), 2025-08-19
Supplement: Supplementary file 1 [file 47810e3ecc75c1c5c091c882.xlsx]

## Sheet: Hoja1
Sample	Province	Municipality	Symptoms onset date	Sample collection date	Ct
2	Santiago de Cuba	Boniato	2024-05-12	2024-05-15	22
80	Cienfuegos	Abreu	2024-05-22	2024-05-24	19
105	Mayabeque	San Nicolas de Baris	2024-05-28	2024-05-29	23
686	Santiago de Cuba	Santiago de Cuba	2024-05-21	2024-05-23	22.6
687	Santiago de Cuba	Santiago de Cuba	2024-05-21	2024-05-23	22.9
690	Santiago de Cuba	Santiago de Cuba	2024-05-20	2024-05-21	22.4
728	Matanzas	Ciénaga de Zapata	2024-05-27	2024-05-29	27.7
735	Matanzas	Jovellanos	2024-05-22	2024-05-29	28.1
746	Villa Clara	Ranchuelo	2024-05-29	2024-05-29	23.46
751	Villa Clara	Ranchuelo	2024-05-29	2024-05-29	20.7
838	Ciego de Avila	Majagua	2024-05-27	2024-05-30	26.7
842	Ciego de Avila	Bolivia	2024-05-30	2024-06-01	28.2
886	Sancti Spiritus	Cabaiguan	no reported	2024-06-07	20.5
887	Sancti Spiritus	Cabaiguan	no reported	2024-06-07	22.2
888	Sancti Spiritus	Cabaiguan	no reported	2024-06-07	16.8
897	Guantanamo	El Salvador	2024-05-26	2024-05-29	24.5
952	Holgín	Cacocun	2024-06-10	2024-06-13	27.9
954	Holgín	Cacocun	2024-06-11	2024-06-13	22.1
955	Holgín	Cacocun	2024-06-11	2024-06-13	23.2
957	Holgín	Cacocun	2024-06-12	2024-06-13	19.7
981	Camaguey	Minas	no reported	2024-06-18	20.5
984	La Habana	Marianao	no reported	2024-06-20	25.2
1010	Granma	Bayamo	2024-06-12	2024-06-15	24.1
1011	Granma	Bayamo	2024-06-13	2024-06-15	24.4
1016	Guantánamo	El Salvador	2024-06-14	2024-06-15	24.4
1037	Ciego de Avila	Chambas	2024-06-09	2024-06-12	20.4
1040	Ciego de Avila	Ciro Redondo	2024-06-13	2024-06-14	25.4
1044	Ciego de Avila	Baraguá	2024-06-22	2024-06-23	24.6
1046	Camagüey	Florida	2024-06-24	2024-06-25	19.2
1047	Camagüey	Florida	2024-06-24	2024-06-25	20.2
1049	Camagüey	Florida	2024-06-22	2024-06-25	28.5
1054	Camagüey	Camagüey	2024-06-24	2024-06-25	22.4
1086	Artemisa	Alquizar	2024-06-26	2024-06-29	26.7
1087	Artemisa	Alquizar	2024-06-26	2024-06-29	25.9
1167	Camagüey	Camagüey	2024-06-29	2024-07-01	18.6
1174	Guantánamo	Guantánamo	2024-06-16	2024-06-18	25.4
1255	Pinar del Río	Los Palacios	2024-07-05	2024-07-05	19.8
1261	Pinar del Río	La Palma	2024-07-08	2024-07-08	20.9
1272	La Habana	La Lisa	2024-07-09	2024-07-09	19.9
