# Supplementary material for: Countrywide Spread and Spatiotemporal Diffusion Dynamics of Oropouche virus in Cuba, 2024
Source: Research Square preprint supplement (doi:10.21203/rs.3.rs-7303560/v1), 2025-08-19
Supplement: Supplementary file 2 [file 6e1331562992c02b96a94fb3.docx]

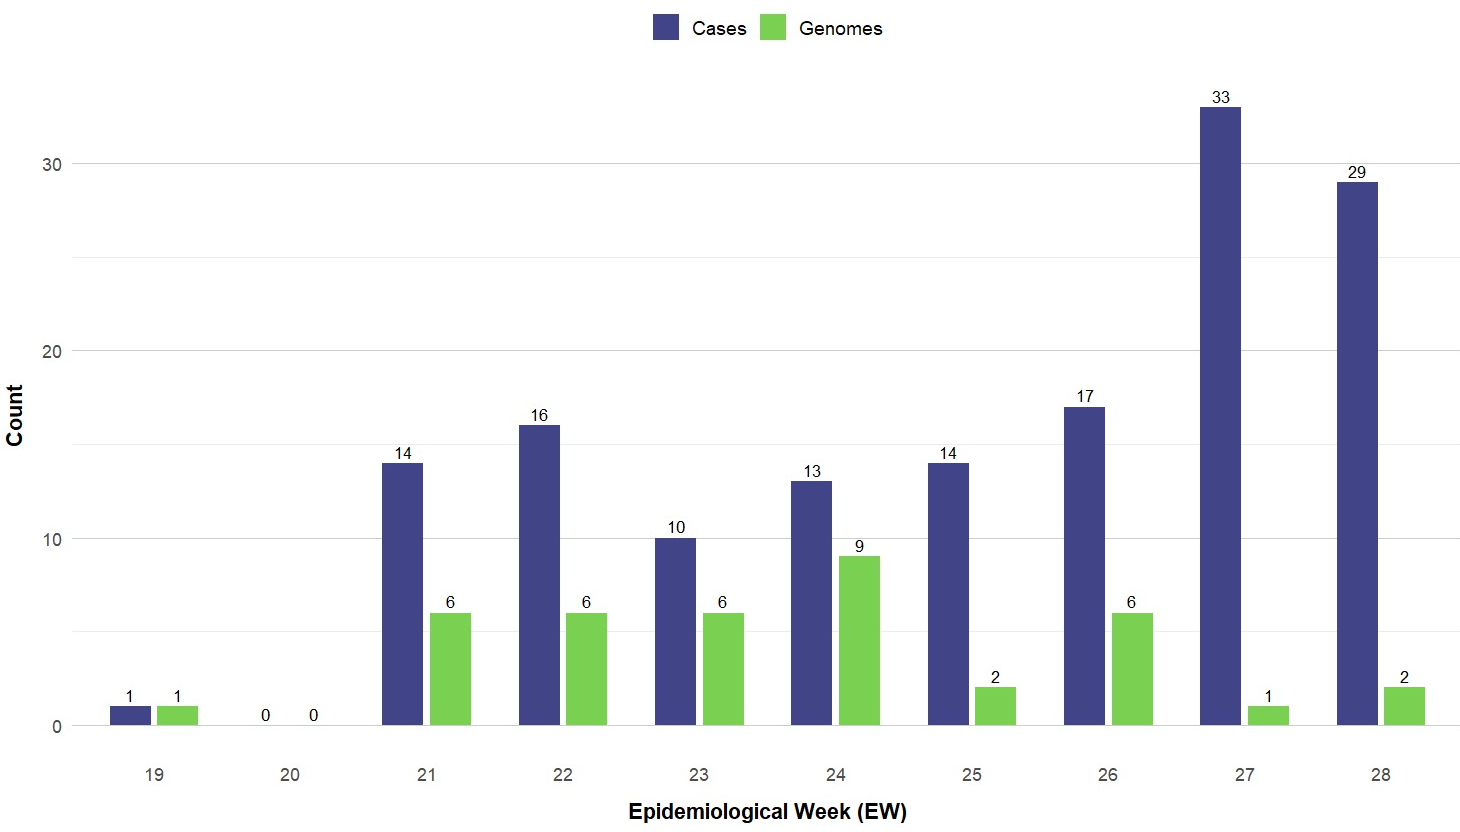


**Supplementary figure 1. Oropouche cases in Cuba and OROV genomes by epidemiological week.** The blue bars represent the number of Oropouche cases throughout the country, whereas the green bars represent the number of genomes generated in this study for each Epidemiological Week (EW). Therefore, OROV genomes were represented during all EW of the OROV Cuban outbreak.
