# Supplementary material for: Countrywide Spread and Spatiotemporal Diffusion Dynamics of Oropouche virus in Cuba, 2024
Source: Research Square preprint supplement (doi:10.21203/rs.3.rs-7303560/v1), 2025-08-19
Supplement: Supplementary file 3 [file 77c2df6c47420f5ae2673a71.docx]

*
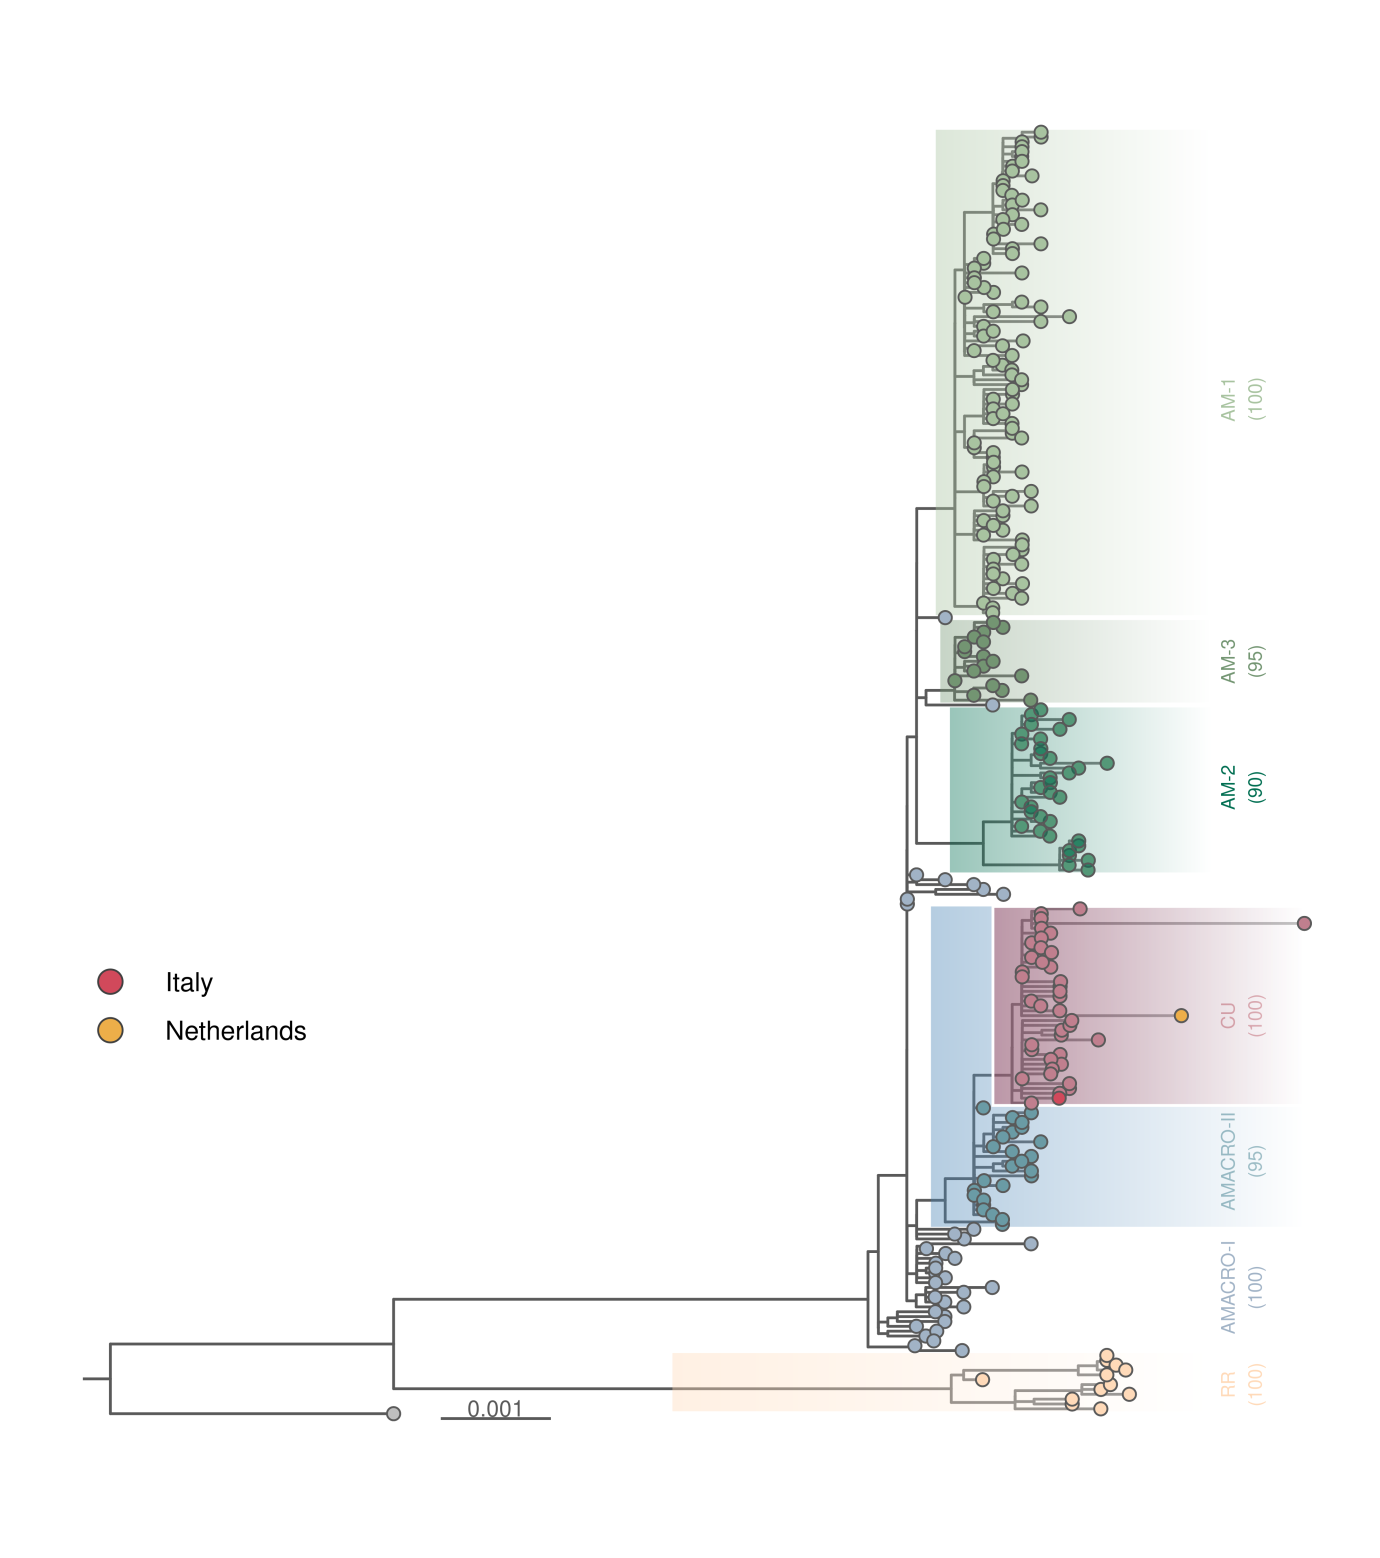
*

**Supplementary Figure 2. International Dissemination of the Cuban OROV Clade.** Maximum likelihood phylogenetic tree based on concatenated OROV genomes (n = 284) from the OROVBR-2015-2024 clade, including Cuban OROV genomes (n = 39), and two OROV genomes sampled in Italy (n = 1) and the Netherlands (n = 1). Clusters are annotated with their respective names and statistical support values (aLRT). The tree is scaled according to the legend at the bottom of the panel.
